# Supplementary material
Source: PubMed Central journal article supplement (PMC3718221)
Supplement: supp_mct133_mct133supp.pdf [file supp_mct133_mct133supp.pdf]

# SUPPLEMENTARY DATA

FIG S1. Small RNA length distribution for four sequenced libraries.

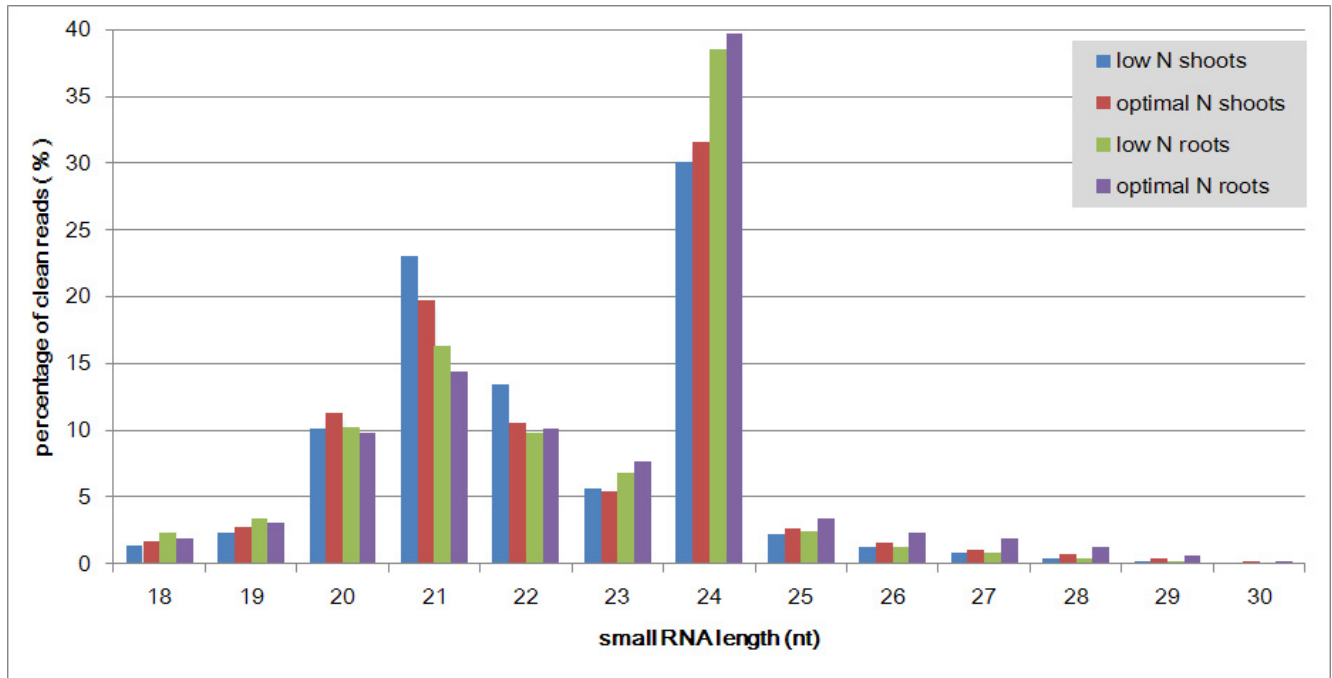

FIG. S2. Multiple alignments of known and two new zma-miR169 species, miRC10 and miR68, along with their hairpin secondary structure precursors. Note: all nucleotides 'U' in miRNAs were converted into 'T' for alignment by using DNASTar DNA sequence alignment tools.

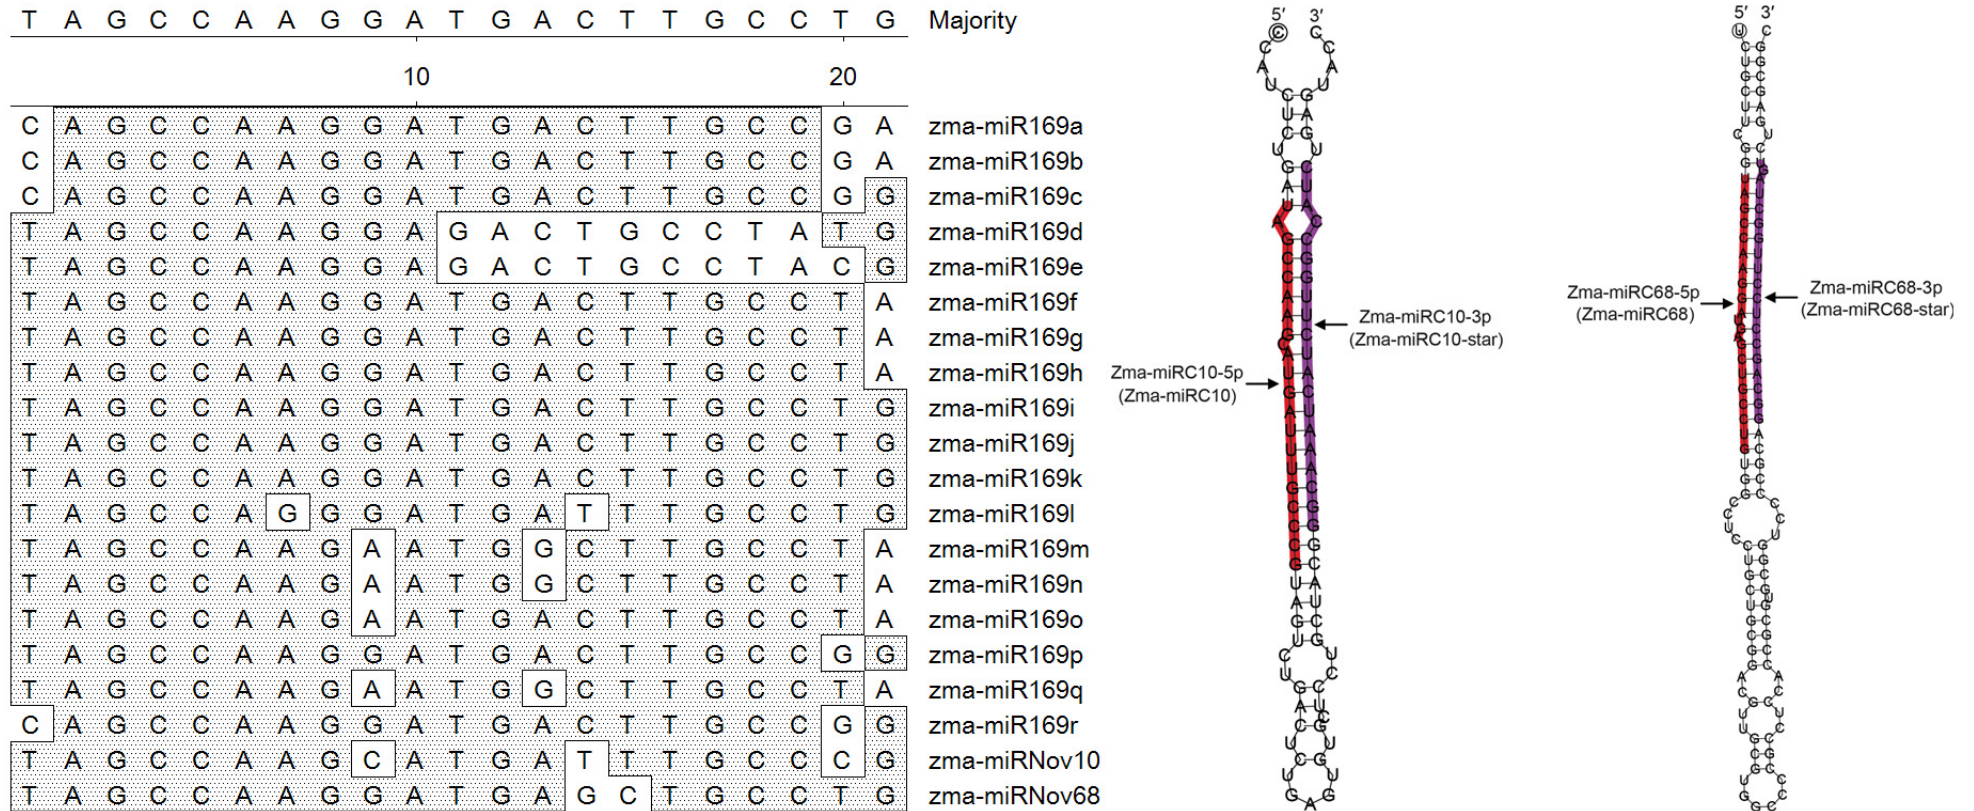

FIG S3. Overview of the phenotype for nitrogen deficiency and hydroponic culture system used in this study.

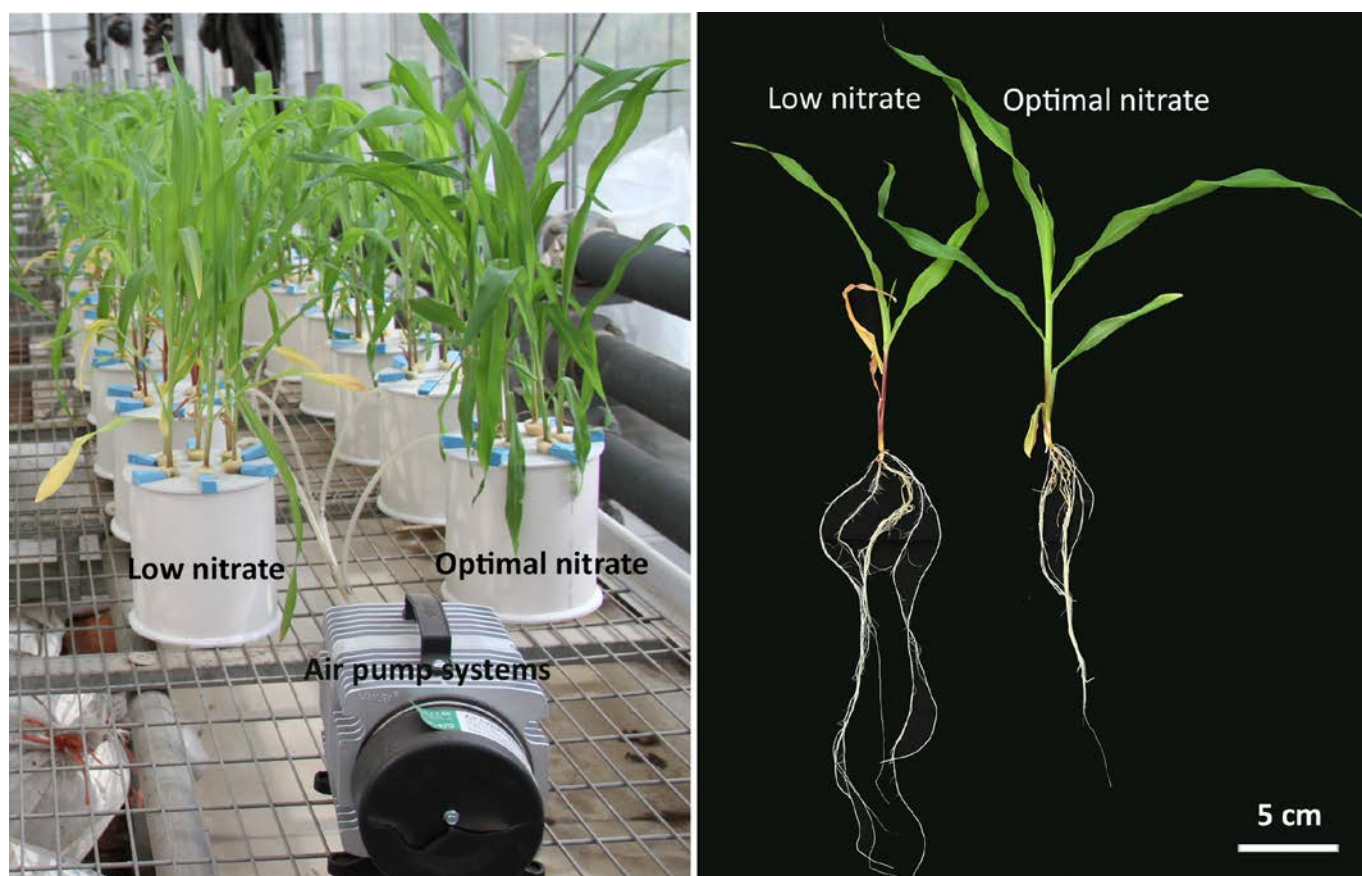

TABLE S1. Statistics of small RNA and degradome sequences from maize leaves and roots in different nitrogen conditions

| Generated small RNA sequence |                                              | Redundant  |                           | Unique       |                           |
|------------------------------|----------------------------------------------|------------|---------------------------|--------------|---------------------------|
|                              |                                              | Reads      | Matching B73<br>RefGen_v2 | Reads        | Matching B73<br>RefGen_v2 |
| Shoots optimal N             | Raw reads                                    | 11,285,708 |                           |              |                           |
|                              | High quality reads                           | 10,913,877 |                           |              |                           |
|                              | Adaptor removed                              | 10,763,446 |                           |              |                           |
|                              | Other non-sRNA removed (Clean reads)         | 9,581,621  | 7,883,414                 | 2,867,972    | 2,048,077                 |
|                              | rRNA/tRNA/snRNA/snoRNA exact matches removed | 7,997,767  |                           | 2,747,908    |                           |
|                              | Match known miRNAs <sup>a</sup>              | 2,094,506  |                           | 978 (139/75) |                           |
|                              | sRNAs mapping to predicted hairpins          | 41,794     | 41,794                    | 430          | 430                       |
|                              | Predicted hairpins sRNA abundance $\geq 5$   | 41,213     | 41,213                    | 411          | 411                       |
| Roots optimal N              | Raw reads                                    | 14,846,804 |                           |              |                           |
|                              | High quality reads                           | 14,370,615 |                           |              |                           |
|                              | Adaptor removed                              | 14,261,256 |                           |              |                           |
|                              | Other non-sRNA removed (Clean reads)         | 13,690,034 | 9,456,325                 | 5,377,571    | 3,151,133                 |
|                              | rRNA/tRNA/snRNA/snoRNA exact matches removed | 11,924,606 |                           | 5,144,570    |                           |
|                              | Match known miRNAs <sup>a</sup>              | 1,983,157  |                           | 904 (135/90) |                           |
|                              | sRNAs mapping to predicted hairpins          | 20,402     | 20,402                    | 390          | 390                       |
|                              | Predicted hairpins sRNA abundance $\geq 5$   | 20,117     | 20,117                    | 354          | 354                       |
| Shoots low N                 | Raw reads                                    | 13,481,331 |                           |              |                           |
|                              | High quality reads                           | 13,094,971 |                           |              |                           |
|                              | Adaptor removed                              | 12,927,865 |                           |              |                           |
|                              | Other non-sRNA removed (Clean reads)         | 11,747,649 | 10,089,264                | 3,493,347    | 2,548,563                 |
|                              | rRNA/tRNA/snRNA/snoRNA exact matches removed | 9,823,295  |                           | 3,362,985    |                           |

|                                              |                                              |                          |            |                           |           |                           |
|----------------------------------------------|----------------------------------------------|--------------------------|------------|---------------------------|-----------|---------------------------|
|                                              | Match known miRNAs <sup>a</sup>              | 2,608,431                |            | 950 (141/72)              |           |                           |
|                                              | sRNAs mapping to predicted hairpins          | 86,823                   | 86,823     | 649                       | 649       |                           |
|                                              | Predicted hairpins sRNA abundance $\geq 5$   | 85,306                   | 85,306     | 595                       | 595       |                           |
| Roots low N                                  | Raw reads                                    | 13,371,488               |            |                           |           |                           |
|                                              | High quality reads                           | 12,948,270               |            |                           |           |                           |
|                                              | Adaptor removed                              | 12,836,801               |            |                           |           |                           |
|                                              | Other non-sRNA removed (Clean reads)         | 11,882,191               | 9,383,935  | 4,657,891                 | 3,103,550 |                           |
|                                              | rRNA/tRNA/snRNA/snoRNA exact matches removed | 10,274,213               |            | 4,491,085                 |           |                           |
|                                              | Match known miRNAs <sup>a</sup>              | 2,082,051                |            | 953 (138/80)              |           |                           |
|                                              | sRNAs mapping to predicted hairpins          | 18,535                   | 18,535     | 408                       | 408       |                           |
|                                              | Predicted hairpins sRNA abundance $\geq 5$   | 18,241                   | 18,241     | 385                       | 385       |                           |
|                                              |                                              |                          | Redundant  |                           | Unique    |                           |
|                                              | <b>Generated degradome sequence</b>          |                          | Reads      | Matching B73<br>RefGen_v2 | Reads     | Matching B73<br>RefGen_v2 |
| Shoots optimal N                             | Raw reads                                    | 32,561,734               |            |                           |           |                           |
|                                              | High quality reads                           | 32,154,730               |            |                           |           |                           |
|                                              | Adaptor removed                              | 32,001,820               |            |                           |           |                           |
|                                              | Other non-sRNA removed (Clean reads)         | 30,486,153               | 25,841,152 | 2,900,782                 | 1,745,716 |                           |
|                                              | rRNA/tRNA/snRNA/snoRNA exact matches removed | 29,480,132               |            | 2,889,738                 |           |                           |
|                                              | PolyN removed                                | 29,457,989               |            | 2,886,347                 |           |                           |
|                                              | Degraded mRNA associate with miRNAs          | 27,664 (75) <sup>b</sup> |            |                           |           |                           |
|                                              | Roots optimal N                              | Raw reads                | 24,124,886 |                           |           |                           |
| High quality reads                           |                                              | 23,675,597               |            |                           |           |                           |
| Adaptor removed                              |                                              | 23,582,687               |            |                           |           |                           |
| Other non-sRNA removed (Clean reads)         |                                              | 20,777,510               | 14,250,960 | 3,194,074                 | 1,723,813 |                           |
| rRNA/tRNA/snRNA/snoRNA exact matches removed |                                              | 20,056,495               |            | 3,180,523                 |           |                           |

|                                              |                                              |                           |            |           |           |
|----------------------------------------------|----------------------------------------------|---------------------------|------------|-----------|-----------|
|                                              | PolyN removed                                | 19,852,616                |            | 3,165,658 |           |
|                                              | Degraded mRNA associate with miRNAs          | 27,423 (77) <sup>b</sup>  |            |           |           |
| Shoots low N                                 | Raw reads                                    | 22,090,894                |            |           |           |
|                                              | High quality reads                           | 21,431,091                |            |           |           |
|                                              | Adaptor removed                              | 21,344,431                |            |           |           |
|                                              | Other non-sRNA removed (Clean reads)         | 17,420,085                | 15,079,203 | 2,598,245 | 1,924,756 |
|                                              | rRNA/tRNA/snRNA/snoRNA exact matches removed | 16,967,442                |            | 2,587,257 |           |
|                                              | PolyN removed                                | 16,951,151                |            | 2,583,637 |           |
|                                              | Degraded mRNA associate with miRNAs          | 29,699 (91) <sup>b</sup>  |            |           |           |
|                                              | Roots low N                                  | Raw reads                 | 27,034,971 |           |           |
| High quality reads                           |                                              | 26,551,921                |            |           |           |
| Adaptor removed                              |                                              | 26,411,771                |            |           |           |
| Other non-sRNA removed (Clean reads)         |                                              | 23,114,461                | 18,813,556 | 4,017,159 | 2,633,011 |
| rRNA/tRNA/snRNA/snoRNA exact matches removed |                                              | 22,640,904                |            | 4,003,159 |           |
| PolyN removed                                |                                              | 22,601,132                |            | 3,990,300 |           |
| Degraded mRNA associate with miRNAs          |                                              | 31,147 (102) <sup>b</sup> |            |           |           |

<sup>a</sup> Small RNAs were matched with known mature miRNAs in miRBase 19.0. Numbers in brackets indicate the number of matching known mature miRNAs /miRNA\*.

<sup>b</sup> Numbers in brackets indicate the number of mature miRNAs in miRBase 19.0 which were matched degraded mRNAs.
